# Supplementary material for: Simultaneously enhancing redox kinetics and inhibiting the polysulfide shuttle effect using MOF-derived CoSe hollow sphere structures for advanced Li–S batteries
Source: Royal Society of Chemistry journal article supplement (doi:10.1039/d1nr02044g), 2021-01-01
Supplement: d1nr02044g1.pdf [file d1nr02044g1.pdf]

**Supporting Information**

**Simultaneously Enhancing Redox Kinetics and  
Inhibiting the Polysulfides Shuttle Effect by MOF-  
derived CoSe Hollow Sphere Structures for  
Advanced Li-S Batteries**

Shunyou Hu<sup>a</sup>, Yuanyuan Hu<sup>a</sup>, Xiangli Liu<sup>c,\*,</sup>, Jiaheng Zhang<sup>a,b,\*</sup>

*<sup>a</sup>Research Centre of Printed Flexible Electronics, School of Materials Science and  
Engineering, Harbin Institute of Technology,*

*Shenzhen 518055, China*

*<sup>b</sup>State Key Laboratory of Advanced Welding and Joining, Harbin Institute of  
Technology, Shenzhen 518055, China.*

*<sup>c</sup>Shenzhen Engineering Laboratory of Aerospace Detection and Imaging, Department  
of Materials Science and Engineering, Harbin Institute of Technology (Shenzhen),  
Shenzhen 518055, China*

Corresponding author:

Jiaheng Zhang, Email: zhangjiaheng@hit.edu.cn

Xiangli Liu, Email: xiangliliu@hit.edu.cn

## Experimental section

### 1. Preparation of carbon with hollow structures (C HSs)

In a typical procedure, the obtained Co/C HSs powder was then immersed in 2 M HCl aqueous solution and heated at 150 °C for 24 h<sup>-1</sup>. After cooling to room temperature, the C HSs powder was collected and washed with deionized water and ethanol for 3 times, respectively.

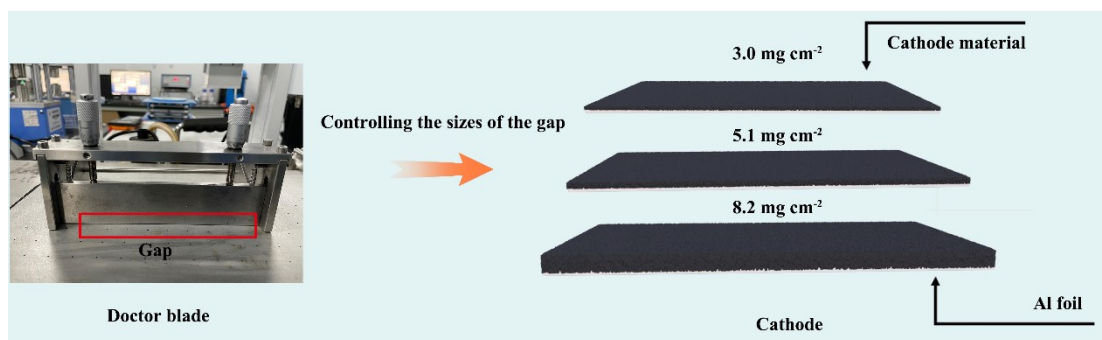

Scheme. S1 The preparation of the high sulfur loading electrodes using the adjustable doctor blade.

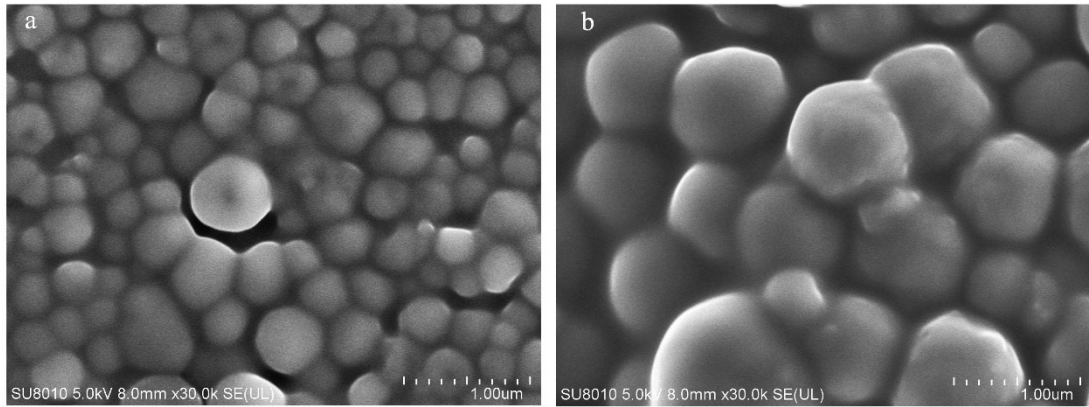

Fig. S1 SEM images of the Co-MOF.

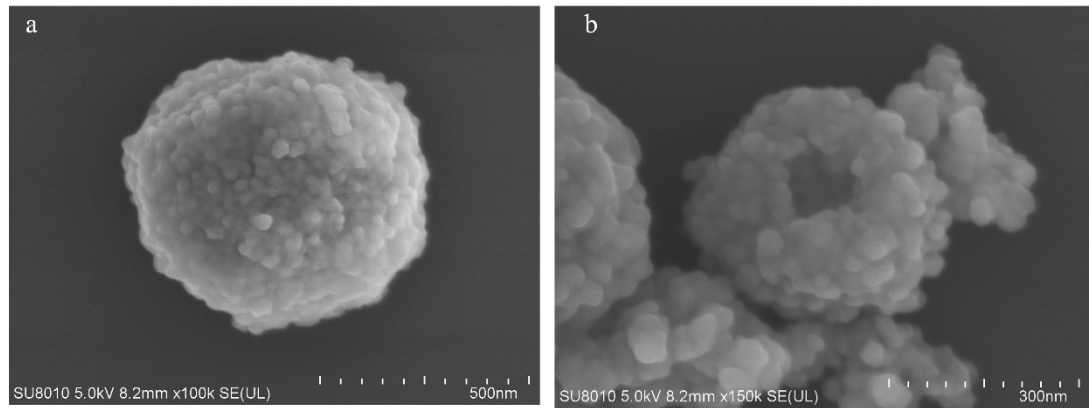

Fig. S2 SEM images of CoSe/C HSs.

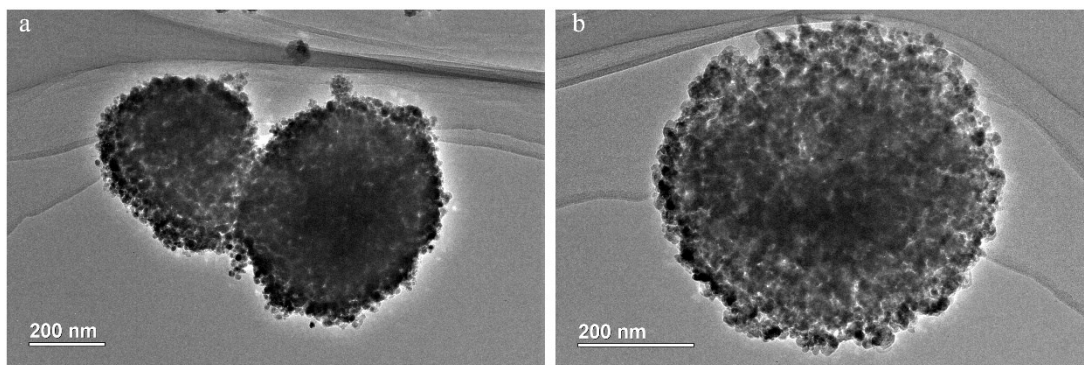

Fig. S3 TEM images of CoSe/C HSs.

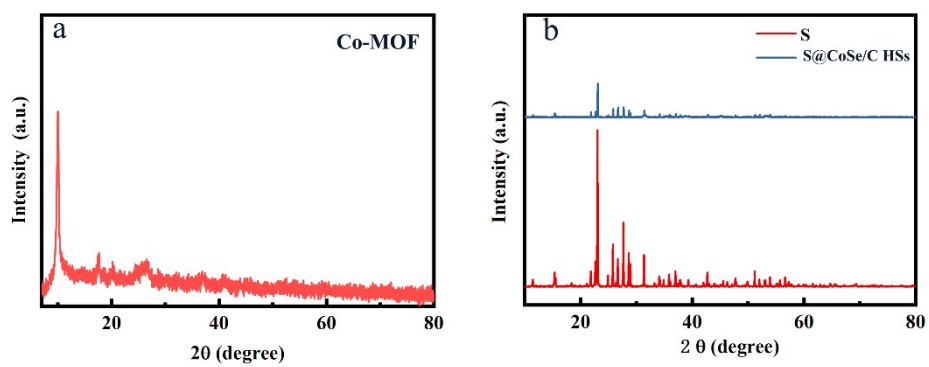

Fig. S4 XRD patterns of Co-MOF (a), S and S@CoSe/C HSs (b).

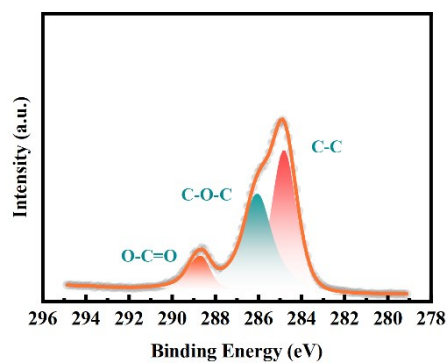

Fig. S5 XPS spectrum of C 1s of CoSe/C HSs.

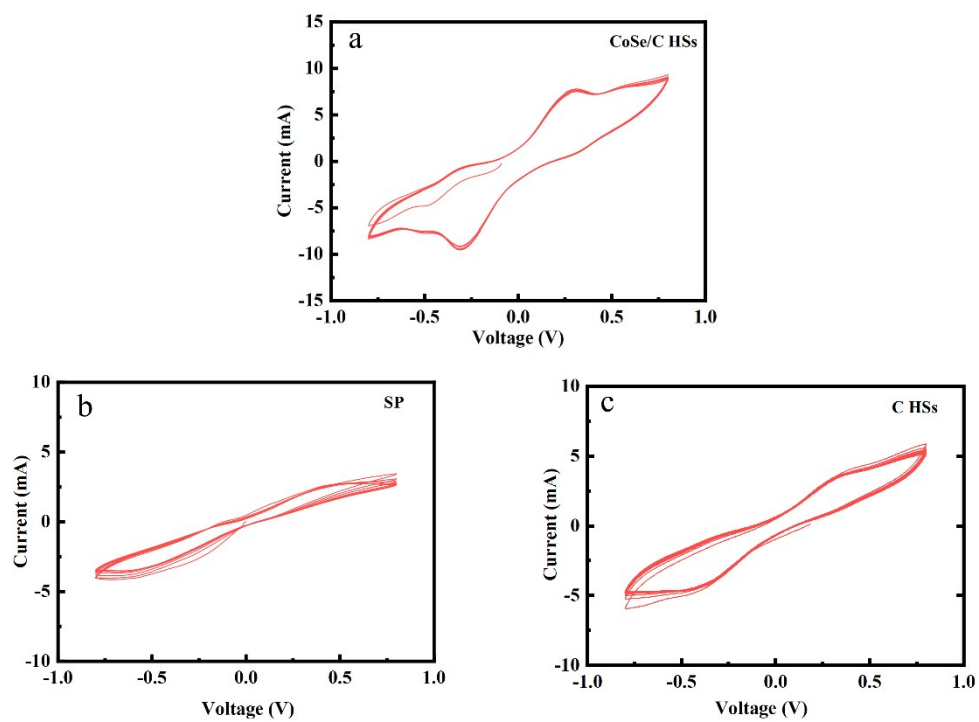

Fig. S6 CV curves of symmetric cells with S@CoSe/C HSs (a), S@SP (b), and S@CHSs (c) electrodes for 10 cycles.

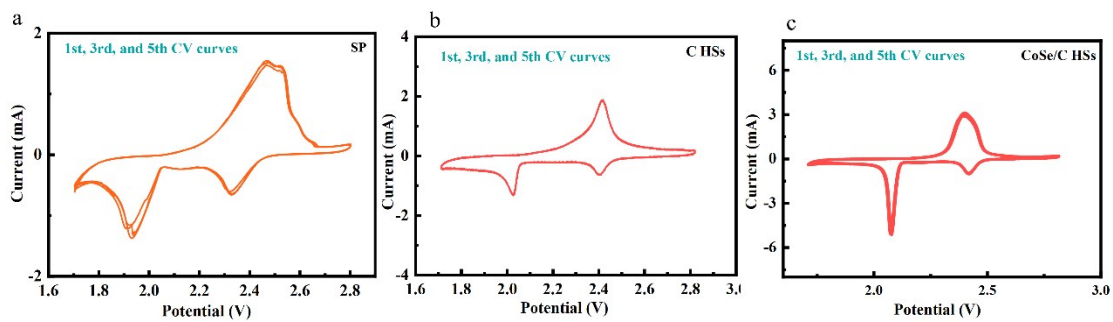

Fig. S7 The 1st, 3rd and 5th CV curves of cells with S@SP (a), S@CHSs (b) and S@CoSe/C HSs (c) electrodes.

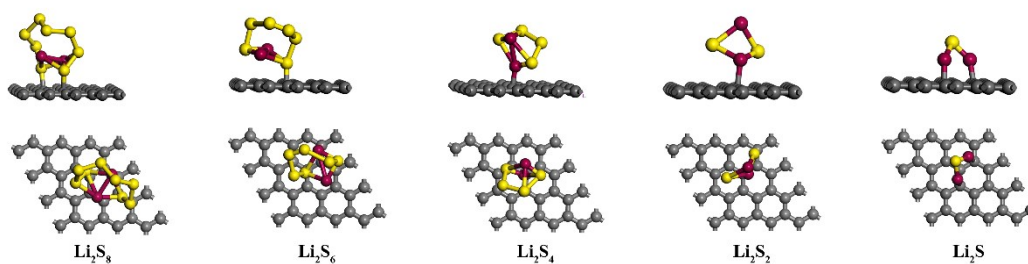

Fig. S8 Optimized configurations of polysulfides adsorption on graphene.

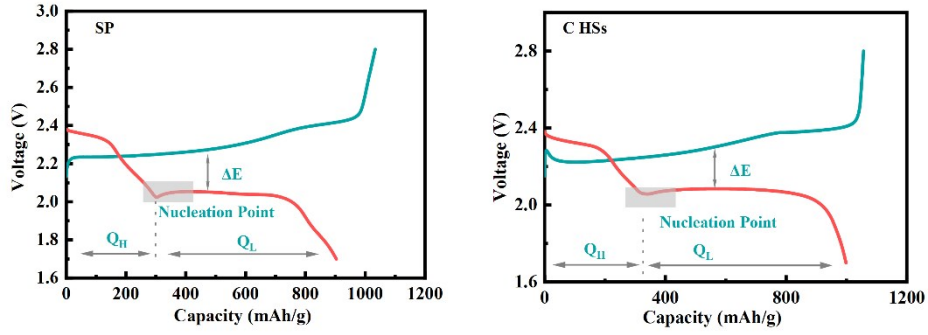

Fig. S9 The charge/discharge profiles for the first cycle of the cells with S@SP and S@C HSs electrodes.

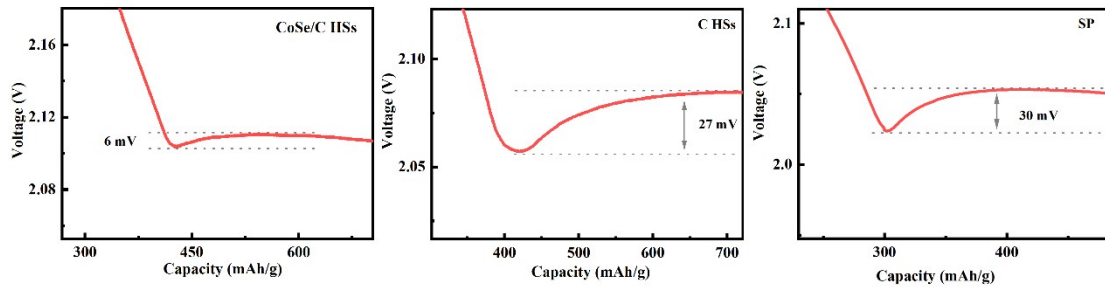

Fig. S10 The overpotential of  $\text{Li}_2\text{S}_2/\text{Li}_2\text{S}$  nucleation of the cells with S@CoSe/C HSs (a), S@CHSs (b) and S@SP (c) electrodes.

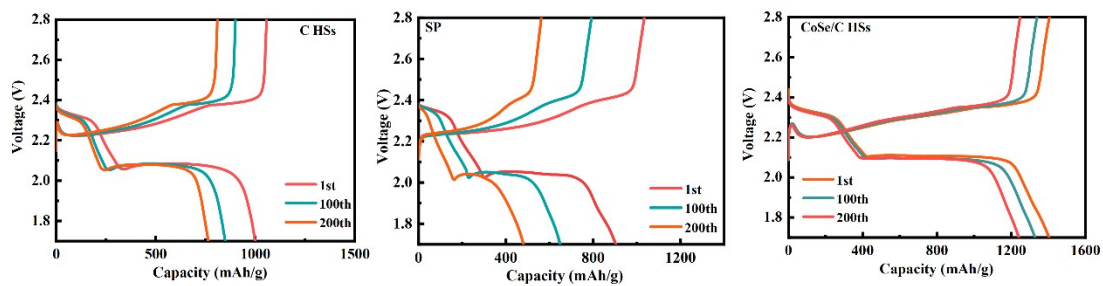

Fig. S11 The 1st, 100th and 200th charge/discharge profiles of the cells with S@CHSs, S@SP and S@CoSe/C HSs electrodes.

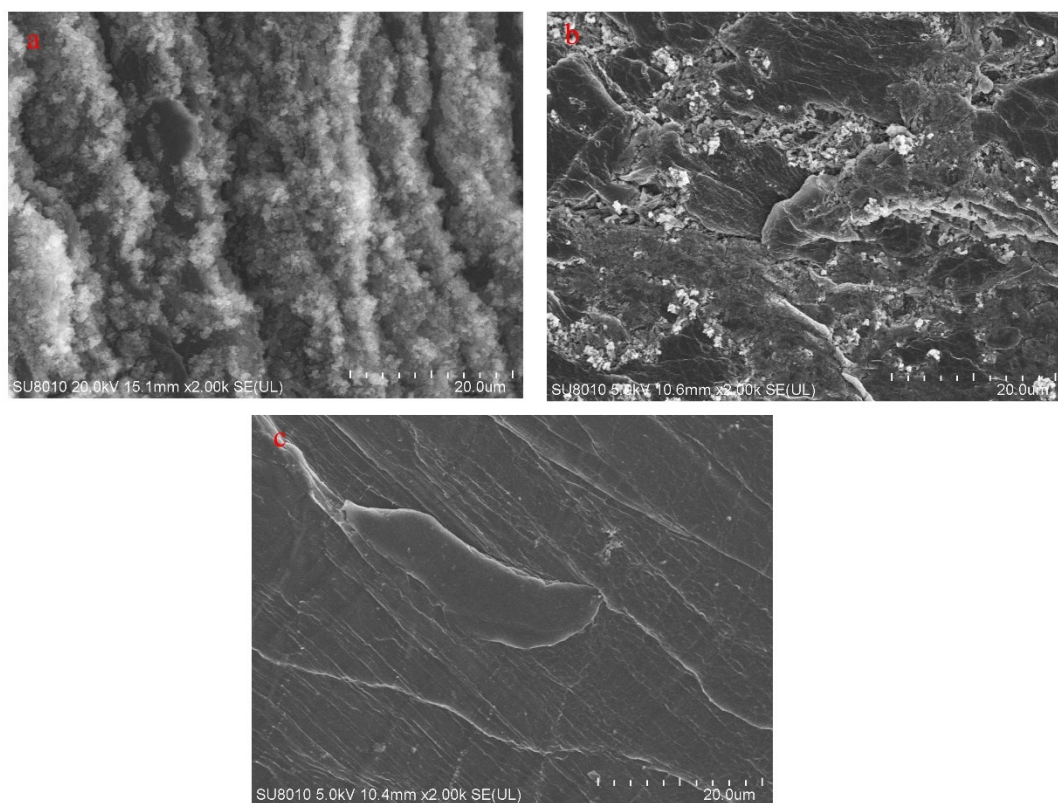

Fig. S12 SEM images of the Li anodes of the cells with S@SP (a), S@C/HSs (b) and S@CoSe/C HSs (c) cathode.



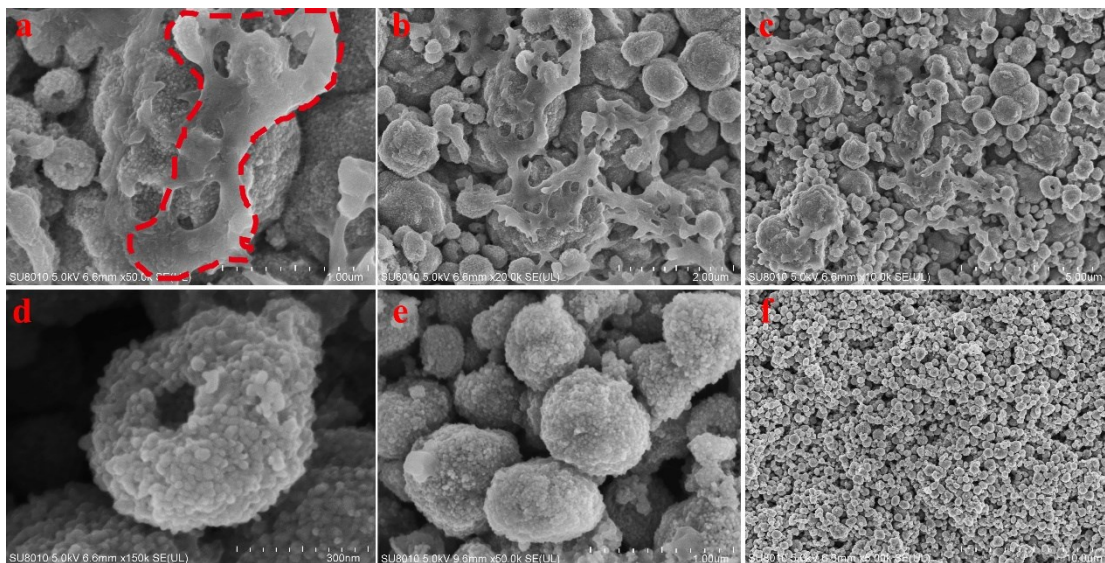

Fig. S13 SEM images of S@C HSs (a-c) and S@CoSe/C HSs (d-f) electrodes after cycles.

Table S1. The electrochemical performance of various cathodes of Li-S batteries.

| Cathode                             | Current Rate (C)        | Area loading (mg cm <sup>-2</sup> ) | Discharge capacity (mAh g <sup>-1</sup> ) | Ref. |
|-------------------------------------|-------------------------|-------------------------------------|-------------------------------------------|------|
| S@CP                                | 0.2                     | 1.5                                 | 1000                                      | 2    |
| S@N-C                               | 0.05                    | 1.2                                 | 1107                                      | 3    |
| S@CNF/LPS/CNT                       | 0.2                     | 7.64                                | 452                                       | 4    |
| S@3d-omsh/pure-carbon               | 0.2                     | 1.2                                 | 950                                       | 5    |
| S@TiN                               | 0.5                     | 1.0                                 | 899                                       | 6    |
| CNT-NC@GC/S                         | 0.1                     | 1.3                                 | 1100                                      | 7    |
| S/CP@NCNT                           | 1.3 mA cm <sup>-2</sup> | 6                                   | 1175                                      | 8    |
| S@H-LDH                             | 0.5                     | 1.5-2.0                             | 825                                       | 9    |
| S@CoP/NC                            | 0.2                     | 1.0                                 | 1263                                      | 10   |
| S@rGO                               | 0.2                     | 2.1                                 | 1283                                      | 11   |
| S@3DP-SP                            | 0.2                     | 3.3                                 | 837                                       | 12   |
| S@g-C <sub>3</sub> N <sub>4</sub>   | 0.2                     | 1.0                                 | 1200                                      | 13   |
| S/Fe <sub>3</sub> O <sub>4</sub> @C | 0.5                     | 1.1                                 | 1195                                      | 14   |
| S@Co@N-C                            | 0.1                     | 3.6                                 | 1250                                      | 15   |
| Ni-MOFs                             | 0.1                     | —                                   | 700                                       | 16   |
| RGO/C-Co-S                          | 0.3 A g <sup>-1</sup>   | 1                                   | 1233                                      | 17   |
| S@Co/G                              | 0.2                     | 2                                   | 875                                       | 18   |
| Co@NHCRs/S                          | 0.5                     | 0.37                                | 975                                       | 19   |
| S/NiS <sub>2</sub> -C               | 0.2                     | 0.8-1.3                             | 1085                                      | 20   |

## References

- 1 J. Li, J. Li, D. Yan, S. Hou, X. Xu, T. Lu, Y. Yao, W. Mai and L. Pan, *J. Mater. Chem. A*, 2018, **6**, 6595-6605.
- 2 G. Li, W. Lei, D. Luo, Y. Deng, Z. Deng, D. Wang, A. Yu and Z. Chen, *Energy Environ. Sci.*, 2018, **11**, 2372-2381.
- 3 Y. Li, J. Wu, B. Zhang, W. Wang, G. Zhang, Z. W. Seh, N. Zhang, J. Sun, L. Huang, J. Jiang, J. Zhou and Y. Sun, *Energy Storage Mater.*, 2020, **30**, 250-259.
- 4 Y. Li, C. Wang, W. Wang, A. Y. S. Eng, M. Wan, L. Fu, E. Mao, G. Li, J. Tang, Z. W. Seh and Y. Sun, *ACS Nano*, 2020, **14**, 1148-1157.
- 5 C. Zhao, G.-L. Xu, Z. Yu, L. Zhang, I. Hwang, Y.-X. Mo, Y. Ren, L. Cheng, C.-J. Sun, Y. Ren, X. Zuo, J.-T. Li, S.-G. Sun, K. Amine and T. Zhao, *Nat. Nanotechnol.*, 2021, **16**, 166-173.
- 6 Z. Cui, C. Zu, W. Zhou, A. Manthiram and J. B. Goodenough, *Adv. Mater.*, 2016, **28**, 6926-6931.
- 7 F. Zhou, Z. Qiao, Y. Zhang, W. Xu, H. Zheng, Q. Xie, Q. Luo, L. Wang, B. Qu and D.-L. Peng, *Electrochim. Acta*, 2020, **349**, 136378.
- 8 X. Yang, X. Gao, Q. Sun, S. P. Jand, Y. Yu, Y. Zhao, X. Li, K. Adair, L.-Y. Kuo, J. Rohrer, J. Liang, X. Lin, M. N. Banis, Y. Hu, H. Zhang, X. Li, R. Li, H. Zhang, P. Kaghazchi, T.-K. Sham and X. Sun, *Adv. Mater.*, 2019, **31**, 1901220.
- 9 S. Chen, J. Luo, N. Li, X. Han, J. Wang, Q. Deng, Z. Zeng and S. Deng, *Energy Storage Mater.*, 2020, **30**, 187-195.
- 10 K. Xiao, Z. Chen, Z. Liu, L. Zhang, X. Cai, C. Song, Z. Fan, X. Chen, J. Liu and Z. X. Shen, *J. Power Sources*, 2020, **455**, 227959.
- 11 J. Zhou, X. Liu, L. Zhu, J. Zhou, Y. Guan, L. Chen, S. Niu, J. Cai, D. Sun, Y. Zhu, J. Du, G. Wang and Y. Qian, *Joule*, 2018, **2**, 2681-2693.
- 12 J. Cai, Z. Fan, J. Jin, Z. Shi, S. Dou, J. Sun and Z. Liu, *Nano Energy*, 2020, **75**, 104970.
- 13 Z. Jia, H. Zhang, Y. Yu, Y. Chen, J. Yan, X. Li and H. Zhang, *J. Energy Chem.*, 2020, **43**, 71-77.
- 14 W. Sun, C. Liu, Y. Li, S. Luo, S. Liu, X. Hong, K. Xie, Y. Liu, X. Tan and C. Zheng, *ACS Nano*, 2019, **13**, 12137-12147.
- 15 Y. Li, J. Fan, J. Zhang, J. Yang, R. Yuan, J. Chang, M. Zheng and Q. Dong, *ACS Nano*, 2017, **11**, 11417-11424.
- 16 J. Zheng, J. Tian, D. Wu, M. Gu, W. Xu, C. Wang, F. Gao, M. H. Engelhard, J.-G. Zhang, J. Liu and J. Xiao, *Nano Lett.*, 2014, **14**, 2345-2352.
- 17 Z. Li, C. Li, X. Ge, J. Ma, Z. Zhang, Q. Li, C. Wang and L. Yin, *Nano Energy*, 2016, **23**, 15-26.
- 18 Z. Du, X. Chen, W. Hu, C. Chuang, S. Xie, A. Hu, W. Yan, X. Kong, X. Wu, H. Ji and L.-J. Wan, *J. Am. Chem. Soc.*, 2019, **141**, 3977-3985.
- 19 M. Zhang, C. Yu, C. Zhao, X. Song, X. Han, S. Liu, C. Hao and J. Qiu, *Energy Storage Mater.*, 2016, **5**, 223-229.
- 20 Y. Lu, X. Li, J. Liang, L. Hu, Y. Zhu and Y. Qian, *Nanoscale*, 2016, **8**, 17616-17622.
